# Supplementary material for: Reinforced anion exchange membrane based on thermal cross-linking method with outstanding cell performance for reverse electrodialysis
Source: Royal Society of Chemistry journal article supplement (doi:10.1039/c9ra04984c), 2019-01-01
Supplement: c9ra04984c1.pdf [file c9ra04984c1.pdf]

## Reinforced anion exchange membrane based on thermal cross-linking method with outstanding cell performance for reverse electro dialysis

Young Ju Lee<sup>a</sup>, Min Suc Cha<sup>a,b</sup>, Seong-Geun Oh<sup>b</sup>, Soonyong So<sup>a</sup>, Tae-Ho Kim<sup>a</sup>, Won Sun Ryoo<sup>c\*</sup>, Young Taik Hong<sup>a</sup>, and Jang Yong Lee<sup>a\*</sup>

<sup>a</sup>Center for Membrane, Korea Research Institute of Chemical Technology, 141 Gajeong-ro, Yuseong-gu, Daejeon 34114, Republic of Korea

<sup>b</sup>Department of Chemical Engineering, Hanyang University, 222 Wangsimni-ro, Seongdong-gu, Seoul 04763, Republic of Korea

<sup>c</sup>Department of Chemical Engineering, Hongik University, 94 Wausan-ro, Mapo-gu, Seoul 04066, Republic of Korea

\*Corresponding author. E-mail: [ljlee@kriect.re.kr](mailto:ljlee@kriect.re.kr)\*

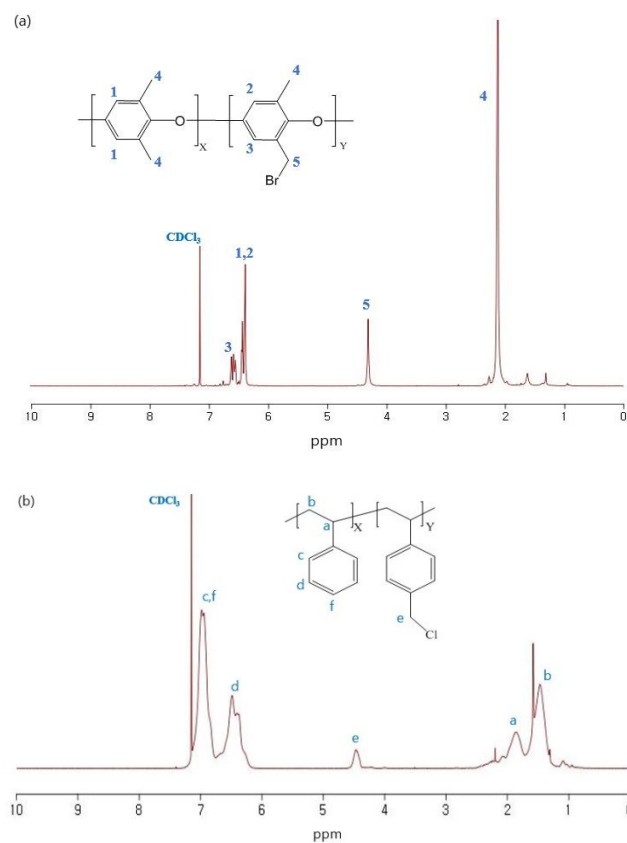

Fig. S1. <sup>1</sup>H NMR spectra of polymer (a) brPPO and (b) cmPS in CDCl<sub>3</sub>

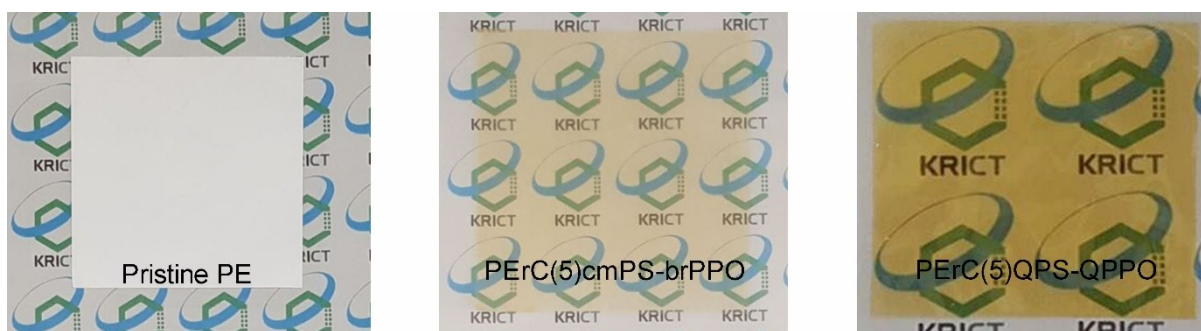

Figure S2. Pristine PE membrane and fabricated membranes

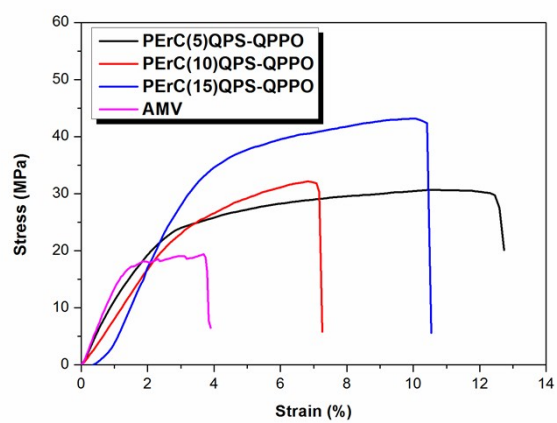

Figure S3. Stress-strain curves of the synthesized polymers and the AMV membrane in the dried state

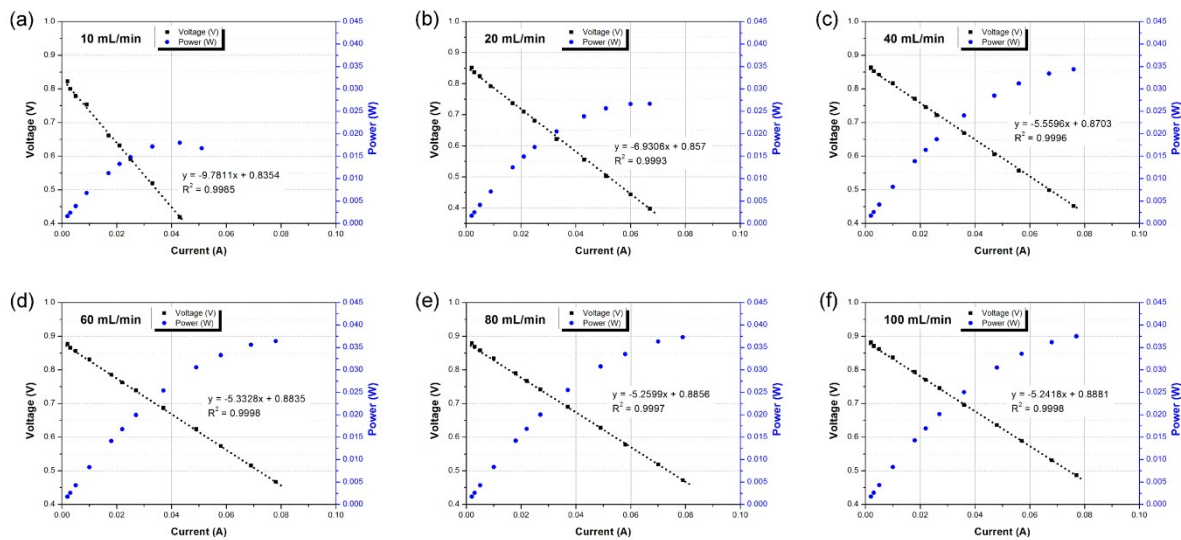

Figure S4. RED stack performance with CMV/AMV membranes

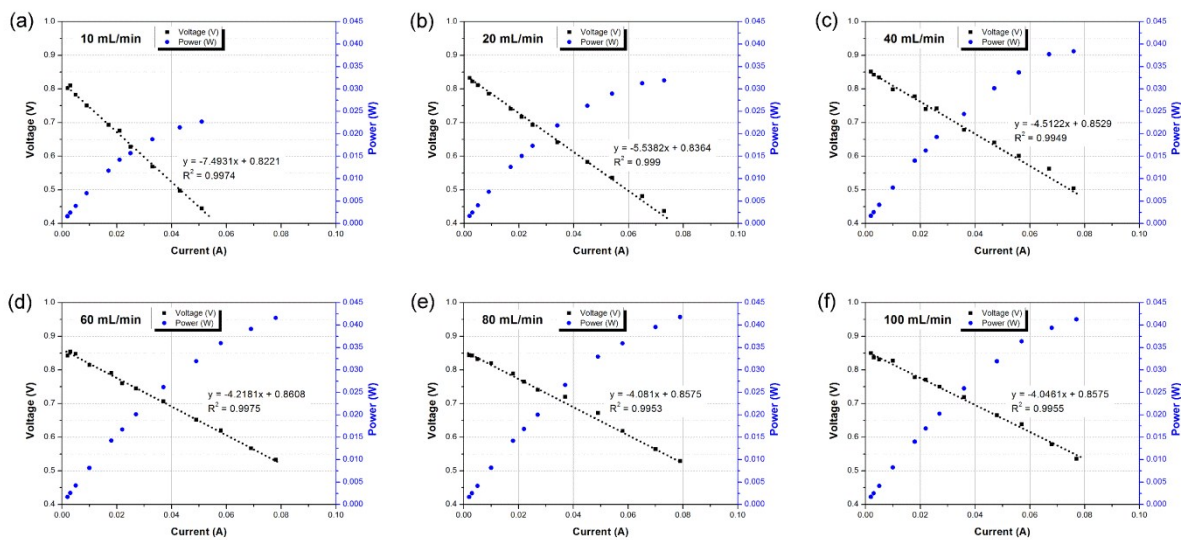

Figure S5. RED stack performance with CMV/PErC(5)QPS-QPPO membranes
